# Supplementary material for: Role of B site ions in bifunctional oxygen electrocatalysis: a structure–property correlation study on doped Ca2Fe2O5 brownmillerites
Source: Royal Society of Chemistry journal article supplement (doi:10.1039/d0cp02391d), 2020-01-01
Supplement: d0cp02391d1.pdf [file d0cp02391d1.pdf]

## Electronic Supplementary Information

# Role of B site ion in bifunctional oxygen electrocatalysis: A structure property correlation study on doped $\text{Ca}_2\text{Fe}_2\text{O}_5$ brownmillerites

*Shibin Thundiyil<sup>a,c</sup>, C. P. Vinod<sup>a,c</sup>, Sreekumar Kurungot<sup>b,c</sup>, R Nandini Devi<sup>\*a,c</sup>*

<sup>a</sup> Catalysis and Inorganic Chemistry Division, CSIR-NCL, Pune-411008, India

<sup>b</sup>Physical and Material Chemistry Division, CSIR-NCL, Pune-411008, India

<sup>‡</sup>Academy of Scientific and Innovative Research (AcSIR), Ghaziabad-201002, India

### **Corresponding Author**

\*R. Nandini Devi, Principal Scientist, Catalysis and Inorganic Chemistry Division, CSIR-NCL, Pune-411008, Tel: +912025902271, Fax: +91202590 Email: [nr.devi@ncl.res.in](mailto:nr.devi@ncl.res.in)

## 1) Rietveld refinement of PXRD patterns

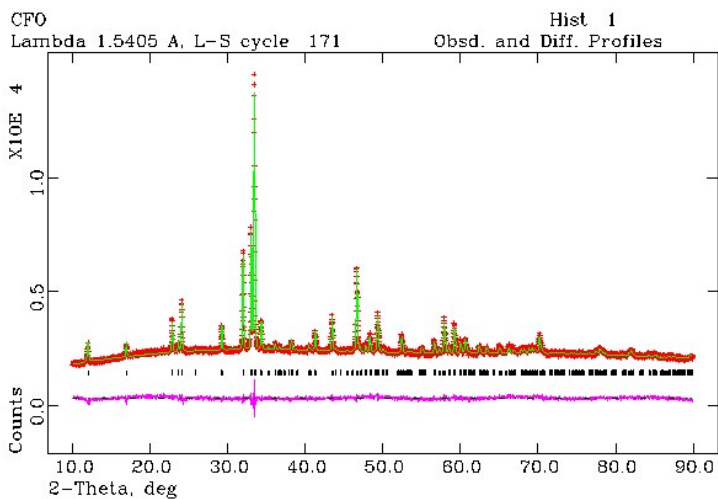

Figure S1: Resultant Rietveld refined pattern of CFO

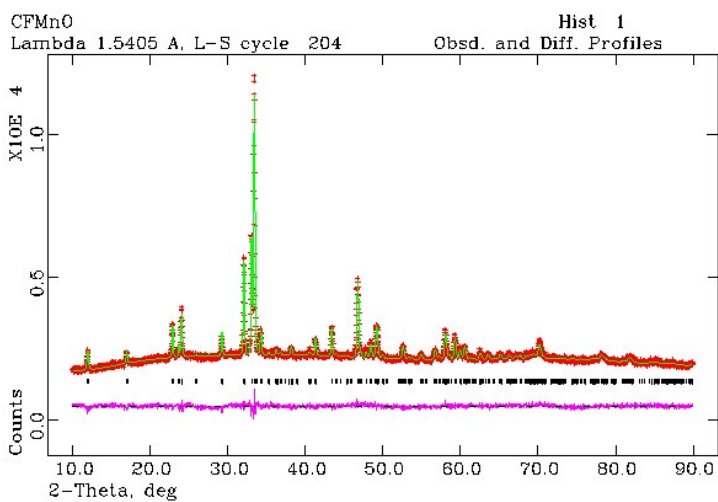

Figure S2: Resultant Rietveld refined pattern of CFMnO

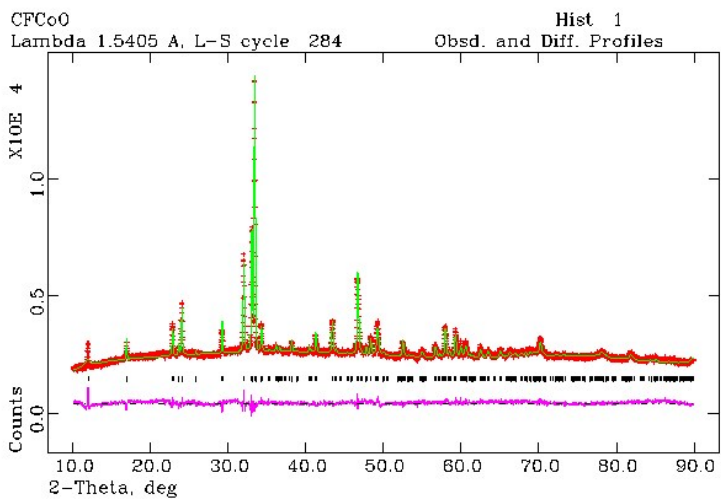

Figure S3: Resultant Rietveld refined pattern of CFCoO

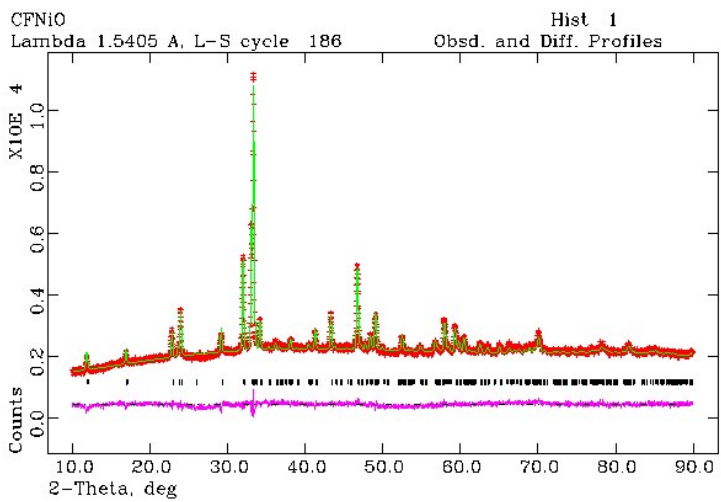

Figure S4: Resultant Rietveld refined pattern of CFNiO

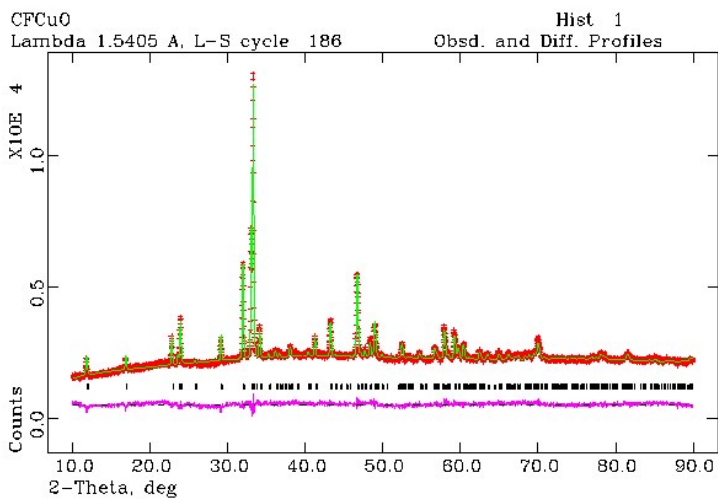

Figure S5: Resultant Rietveld refined pattern of CFCuO

**2) Composition data :XPS, SEM-EDAX, MP-AES data**

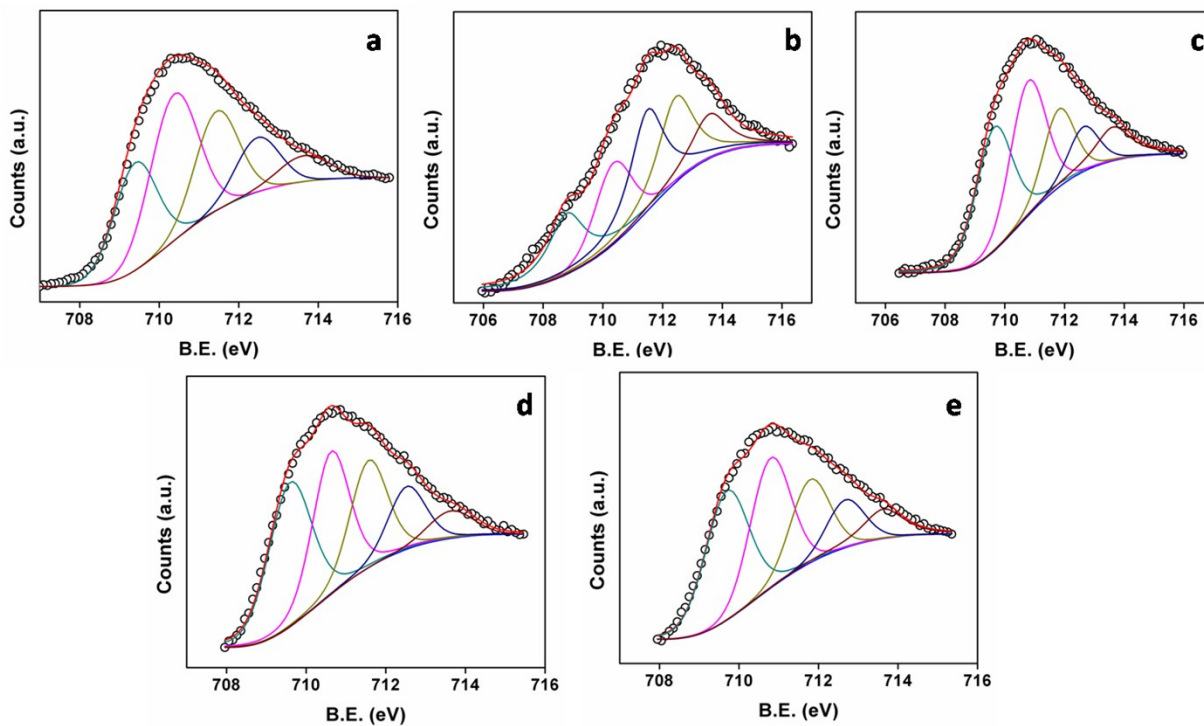

Figure S6 : Fe<sub>2p</sub> XPS spectra of a) CFO b) CFMnO c) CFCoO d) CFNiO e) CFCuO

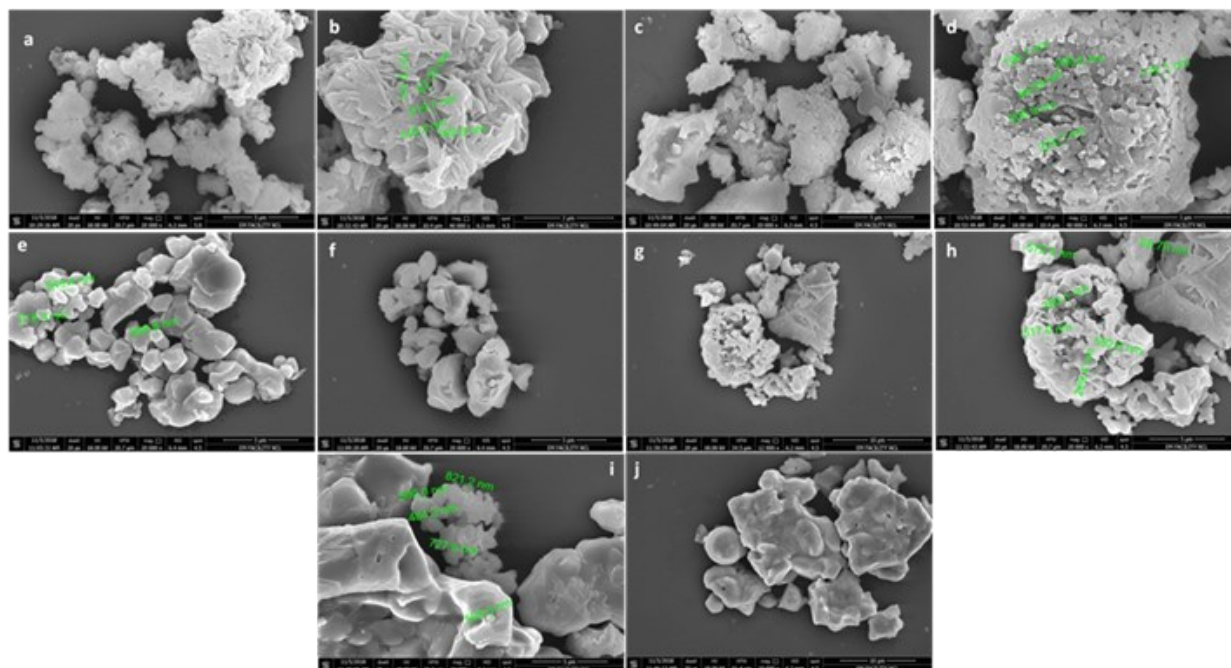

Figure S7 : SEM Images of a) and b) CFO c) and d) CFMnO e) and f) CFCoO g) and h) CFNiO i) and j) CFCuO. Few particle dimensions are given in green.

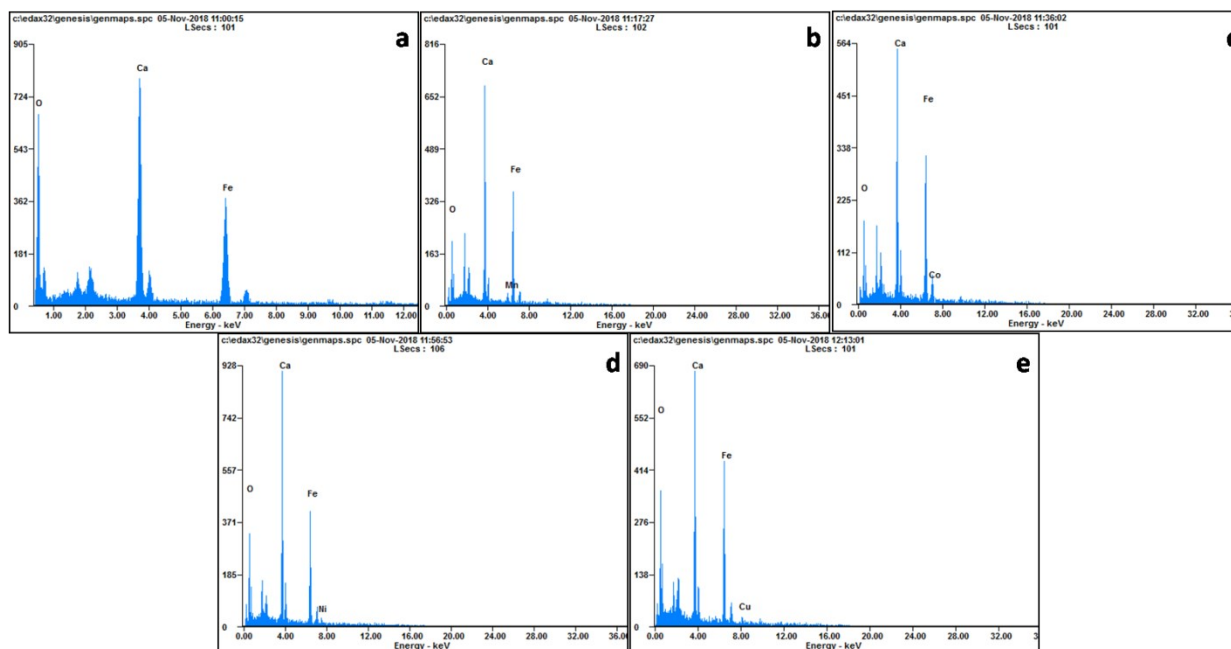

Figure S8: EDAX profiles of a) CFO b) CFMnO c) CFCoO d) CFNiO e) CFCuO

Table S1: EDAX Data

|       |    | Wt %  | Calculated |
|-------|----|-------|------------|
| CFO   | Ca | 21.51 | 29.48      |
|       | Fe | 32.33 | 41.087     |
|       | O  | 46.16 | 29.47      |
| CFMnO | Ca | 26.56 | 29.49      |
|       | Fe | 40.64 | 39.046     |
|       | Mn | 2.01  | 2.02       |
|       | O  | 31.10 | 29.43      |
| CFCoO | Ca | 28.76 | 29.4524    |
|       | Fe | 44.09 | 38.98      |
|       | Co | 3.61  | 2.17       |
|       | O  | 23.53 | 29.39      |
| CFNiO | Ca | 25.04 | 29.45      |
|       | Fe | 36.81 | 38.99      |
|       | Ni | 2.74  | 2.16       |
|       | O  | 35.41 | 29.39      |
| CFCuO | Ca | 23.97 | 29.4       |
|       | Fe | 36.43 | 38.92      |
|       | Cu | 2.31  | 2.33       |
|       | O  | 37.30 | 29.34      |

Table S2: MP-AES Results

| Catalyst | Experimental (PPM) |       |             | Calculated (PPM) |       |             |
|----------|--------------------|-------|-------------|------------------|-------|-------------|
|          | Ca                 | Fe    | Mn/Co/Ni/Cu | Ca               | Fe    | Mn/Co/Ni/Cu |
| CFMnO    | 53.7               | 63.7  | 3.03        | 53.1             | 70.3  | 3.6         |
| CFCoO    | 107.9              | 119.6 | 6.37        | 84.8             | 112.3 | 6.24        |
| CFNiO    | 100.3              | 118.2 | 5.9         | 90.72            | 120.1 | 6.64        |
| CFCuO    | 69.6               | 83.7  | 4.9         | 57.63            | 76.3  | 4.57        |

\*4.5mg CFMnO, 7.2mg CFCoO, 7.7mg CFNiO, 4.9mg CFCuO separately dissolved in aquaregia and made upto 25ml MilliQ Ultrapure water.

### 3) Surface area data

Table S3: BET Surface area results

| Catalyst | Surface area m <sup>2</sup> /g |
|----------|--------------------------------|
| CFMnO    | 4.44                           |
| CFCoO    | 0.89                           |

|       |      |
|-------|------|
| CFNiO | 4.23 |
| CFCuO | 8.14 |

#### 4) Electrochemical Data

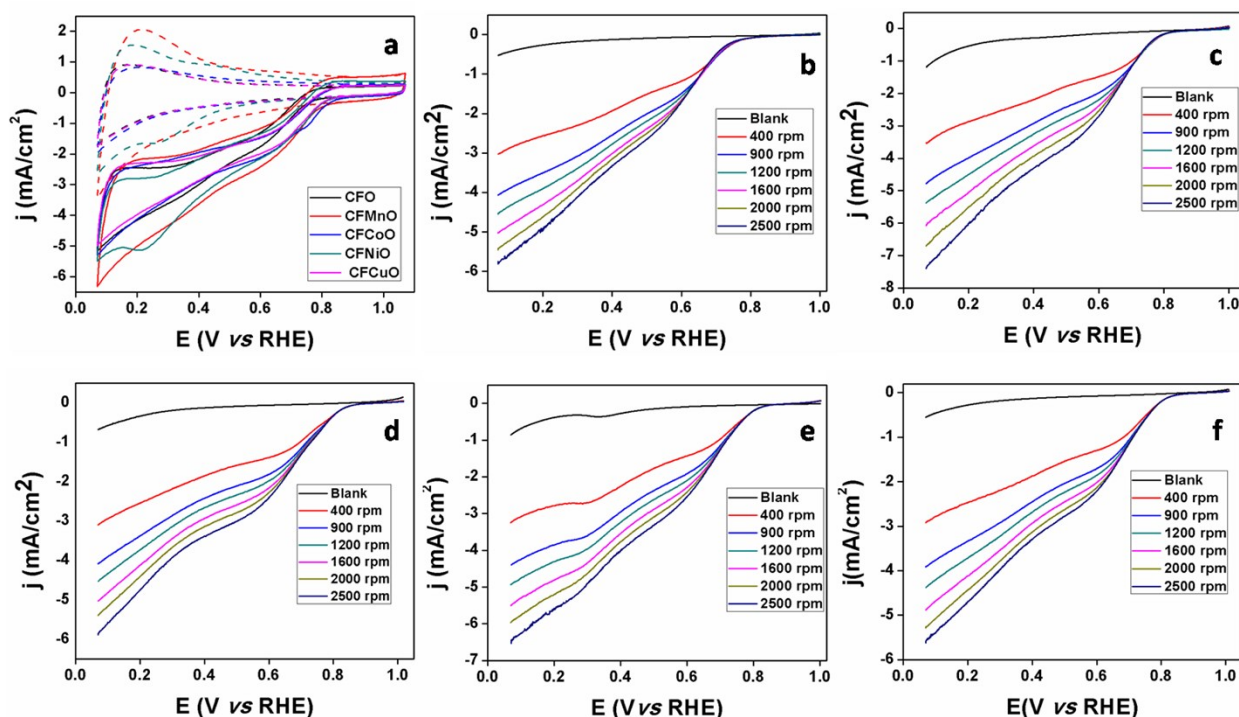

Figure S9: a) Cyclic voltammogram at 900 rpm with 50mV/s scan rate, the dashed profile with N<sub>2</sub> saturation and solid profile is in O<sub>2</sub> saturation. Linear sweep voltammogram at 1600 rpm in O<sub>2</sub> saturation and 10mV/s scan rate of b) CFO c) CFMnO d) CFCoO e) CFNiO f) CFCuO, where blank data is recorded with N<sub>2</sub> saturation without rotation.

#### 4.2) Koutechy-Levich equation

Koutechy Levich equation can be expressed as

$$\frac{1}{I_D} = \frac{1}{I_k} + \frac{1}{I_d} = \frac{1}{I_k} + \frac{1}{B\omega^{1/2}} \quad (1)$$

$$B = 0.62nFAC_0D_0^{2/3}v^{-1/6} \quad (2)$$

$$I_k = nAFKC_0 \quad (3)$$

Where  $I_D$  is the disk voltammetric current which has the contribution of the kinetic current ( $I_k$ ) and diffusion controlled current ( $I_d$ ),  $\omega$  is the rotation speed,  $n$  is the electron transfer number  $F$  is Faradays constant,  $A$  is the geometric area of the electrode,  $C_0$  is the oxygen concentration in the oxygen saturated solution,  $D$  is the diffusion coefficient of oxygen  $\nu$  is the kinematic viscosity of the solution and  $k$  is the electron transfer rate constant. K-L plot is the plot of inverse of disk current against inverse of square root of rotation. The slope value  $B$ , is  $0.46 \text{ mAcm}^{-2}\text{S}^{1/2}$  for a perfect 4 electron transfer reaction.

### 4.3) Tafel equation

Tafel equation can be represented as

$$\eta_c = \frac{RT}{nF\alpha_c} \ln j_0 - \frac{RT}{nF\alpha_a} \ln j = a - b \ln j \quad (4)$$

where  $j_0$  is the exchange current density,  $R$  is the gas constant,  $n$  is the number of electrons involved in the overall reaction,  $\alpha$  is the charge transfer coefficient and  $a$  and  $c$  in the subscripts indicate anodic and cathodic parts. The plot of  $\eta$  against  $\ln j$  is called Tafel plot and the tafel slope  $-b$  from which the rate determining step can be predicted from the slope value.

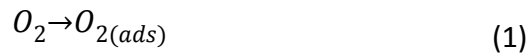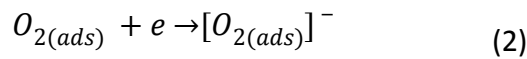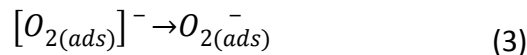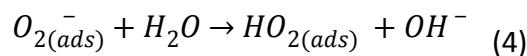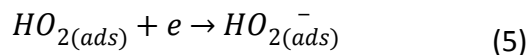



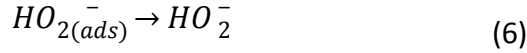

Charge transfer coefficient  $\alpha_a$  can be defined as given by Taylor and Humffray<sup>1</sup>

$$n\alpha_a = \left(\frac{n_f}{\nu} + n_r\beta\right) \quad (5)$$

Where  $n_f$  is the number of electrons transferred before rate determining step (rds),  $n_r$  is the number of electrons transferred in the rds,  $\nu$  is the stoichiometric number of the reaction defined as the number of times the rds occurs for one repetition of the overall reaction and  $\beta$  is the symmetry factor of the rds which has a value near 0.5, the subscript a stands for anodic reaction and for the cathodic reaction, slope value will be of opposite sign.  $n_f$  and  $n_r$  are 0 and 1 respectively for the first electron reduction step resulting in Tafel slope (b) value of -120 mV/decade. If the step followed by the first electron reduction is the rate determining step,  $n_f=1$  and  $n_r = 0$ , resulting in a slope of -60 mV/decade, indicating a pseudo two electron transfer. Similar explanation can be applied to the OER reaction as well. <sup>2</sup>

#### 4.4) Electron transfer number and Peroxide yield

Electron transfer number and peroxide yield was calculated by the equation 6 and 7 respectively.<sup>3</sup>

$$n = 4 * \frac{I_d}{I_d + I_r/N_C} \quad (6)$$

$$p = 200 * \frac{I_r/N_C}{I_d + I_r/N_C} \quad (7)$$

where  $I_d$  is the disk current,  $I_r$  is the ring current  $N_c$  is the collection efficiency, (collection efficiency in the present study is 0.37).

#### References

1. R.J.Taylor and A.A.Humffray, *J. Electroanal. Chem.*, 1975, **64**, 63-84.
2. X. Ge, A. Sumboja, D. Wu, T. An, B. Li, F. W. T. Goh, T. S. A. Hor, Y. Zong and Z. Liu, *ACS Catal.*, 2015, **5**, 4643-4667.
3. R. Zhou, Y. Zheng, M. Jaroniec and S.-Z. Qiao, *ACS Catal.*, 2016, **6**, 4720-4728.
